# Supplementary material for: Facile synthesis of N-doped carbon-coated Li4Ti5O12 microspheres using polydopamine as a carbon source for high rate lithium ion batteries
Source: Royal Society of Chemistry journal article supplement (doi:10.1039/c3ta10623c), 2013-01-01
Supplement: c3ta10623c.pdf [file c3ta10623c.pdf]

# Electronic Supplementary Information for Facile Synthesis of N-Doped Carbon Coated $\text{Li}_4\text{Ti}_5\text{O}_{12}$ Microspheres Using Polydopamine as Carbon Source for High Rate Lithium Ion Batteries

Hongsen Li<sup>a</sup>, Laifa Shen<sup>a</sup>, Kuibo Yin<sup>b</sup>, Jing Ji<sup>b</sup>, Jie Wang<sup>a</sup>, Xiaoyan Wang<sup>a</sup>, Xiaogang Zhang<sup>a\*</sup>

<sup>a</sup> College of Materials Science and Engineering and Key Laboratory for Intelligent Nano Materials and Devices of Ministry of Education, Nanjing 210016, P.R. China.  
Fax: +86 025 52112626. Tel.: +86 025 52112902; E-mail address: azhangxg@163.com.

<sup>b</sup> Key Laboratory of MEMS of Ministry of Education, Southeast University, Nanjing 210096, P.R. China.

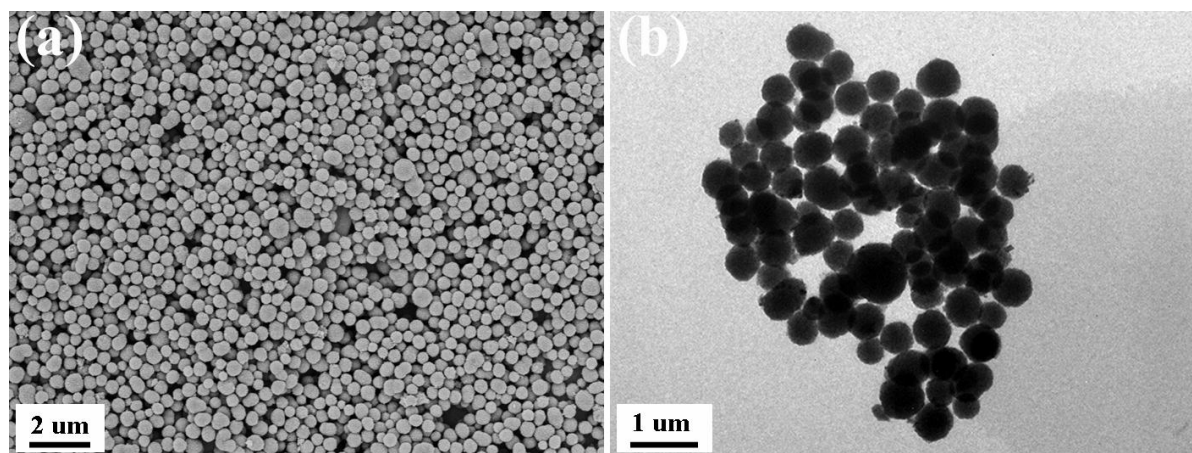

Fig. S1 SEM (a) and TEM (b) image of the TOS

Table S1 Impedance parameters of the pure LTO and NC-LTO electrodes.

| Samples  | $R_s (\Omega)$ | $R_l (\Omega)$ | $R_{ct} (\Omega)$ | $I^0 (\text{mA cm}^{-2})$ |
|----------|----------------|----------------|-------------------|---------------------------|
| Pure LTO | 4.3            | 9.6            | 103.2             | 0.25                      |
| NC-LTO   | 1.9            | 6.2            | 49.5              | 0.52                      |
